# Supplementary material
Source: HighWire-hosted journal article supplement (http://d2538ggaoe6cji.cloudfront.net/highwire/filestream/37643/field_highwire_adjunct_files/5/127936-6.pdf)

A

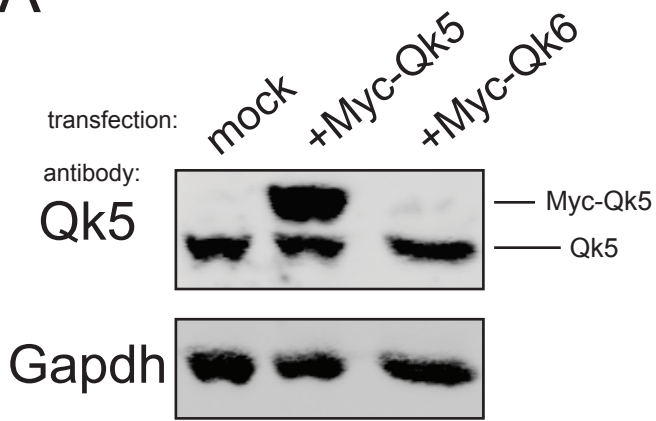

B

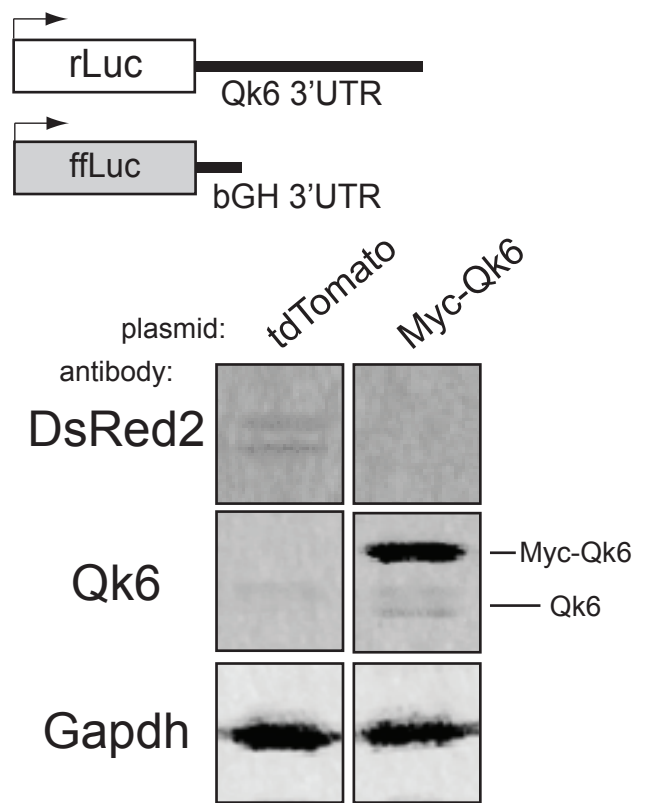

Supplement: 127936-6.pdf [file 127936-6.pdf]
